# Supplementary material for: Enhancing metal–support interaction by in situ ion-exchanging strategy for high performance Pt catalysts in hydrogen evolution reaction
Source: Royal Society of Chemistry journal article supplement (doi:10.1039/d0ta02681f), 2020-01-01
Supplement: d0ta02681f1.pdf [file d0ta02681f1.pdf]

# Supporting Information

## Enhancing Metal-Support Interaction by in-situ Ion-Exchanging Strategy for High Performance Pt catalysts in Hydrogen Evolution Reaction

Xulei Sui,<sup>ab</sup> Lei Zhang,<sup>b</sup> Junjie Li,<sup>b</sup> Kieran Doyle-Davis,<sup>b</sup> Ruying Li,<sup>b</sup> Zhenbo Wang<sup>\*a</sup> and  
Xueliang Sun<sup>\*b</sup>

<sup>a</sup> MITT Key Laboratory of Critical Materials Technology for New Energy Conversion and Storage, School of Chemistry and Chemical Engineering, State Key Laboratory of Urban Water Resource and Environment, Harbin Institute of Technology, 150001, China

<sup>b</sup> Department of Mechanical and Materials Engineering, University of Western Ontario, London, ON N6A 5B9, Canada

Email: [wangzhh@hit.edu.cn](mailto:wangzhh@hit.edu.cn), [xsun9@uwo.ca](mailto:xsun9@uwo.ca)

\* Corresponding authors

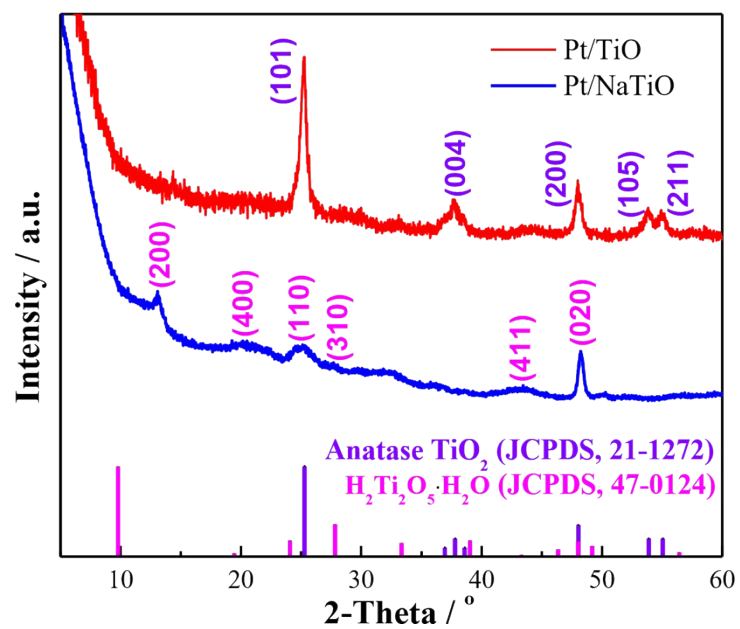

Fig. S1 XRD patterns of Pt/TiO and Pt/NaTiO catalysts

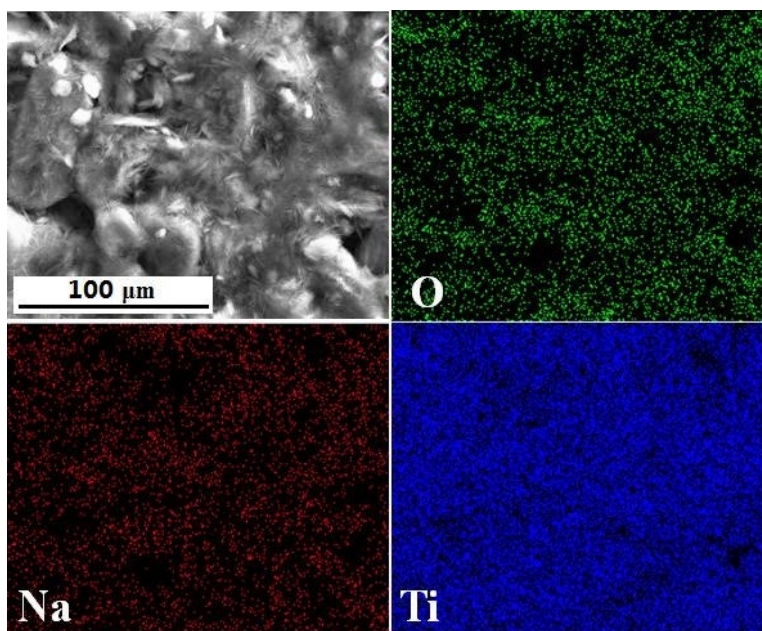

Fig. S2 EDS mapping of Pt/NaTiO

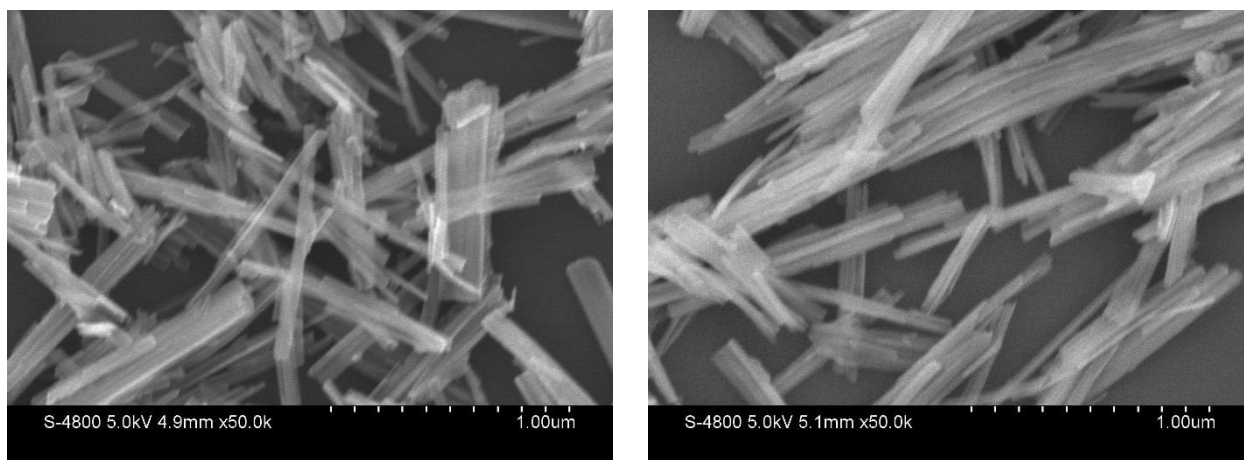

Fig. S3 SEM images of Pt/TiO and Pt/NaTiO catalysts.

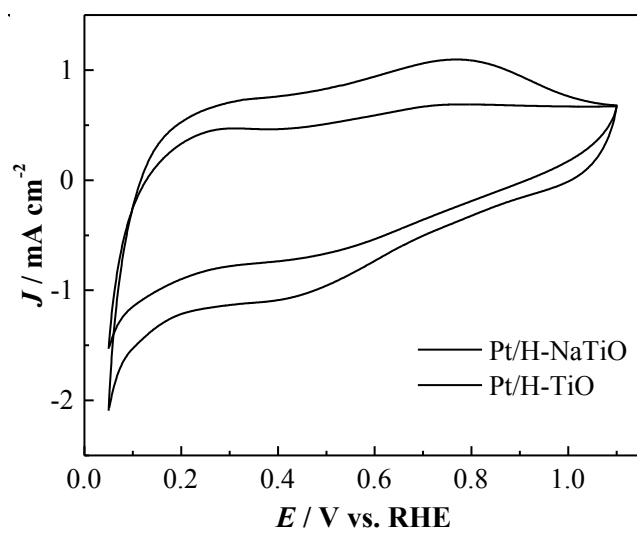

Fig. S4 CV curves of Pt/H-NaTiO and Pt/H-TiO catalysts.

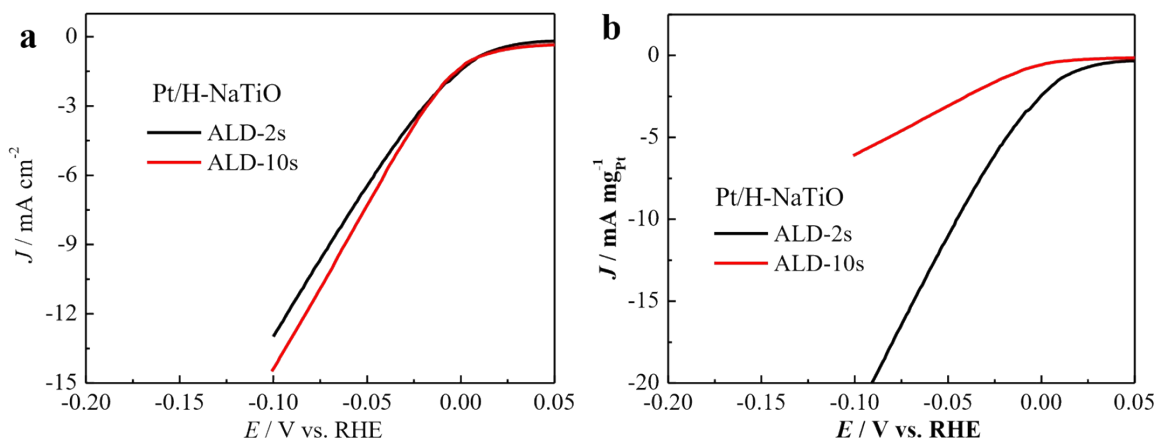

Fig. S5 Polarization curves of Pt/H-NaTiO with ALD time of 2s (Pt 0.23 wt%) and 10s (Pt 0.93 wt%) in acidic electrolyte. (a) normalized by electrode area; (b) normalized by Pt mass.

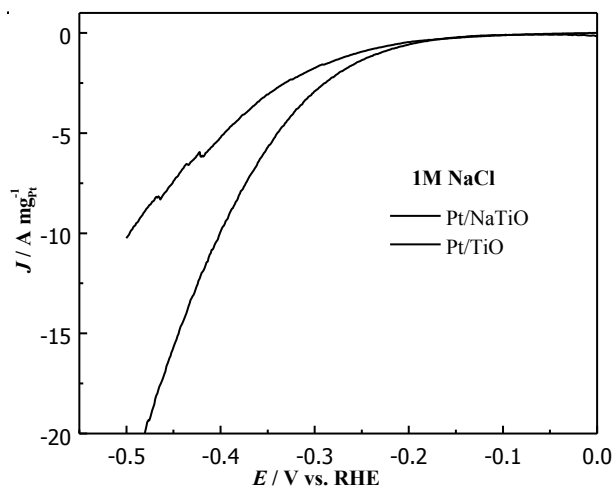

Fig. S6 HER polarization curves for Pt/NaTiO and Pt/TiO catalysts normalized by Pt mass in 1M NaCl electrolyte.

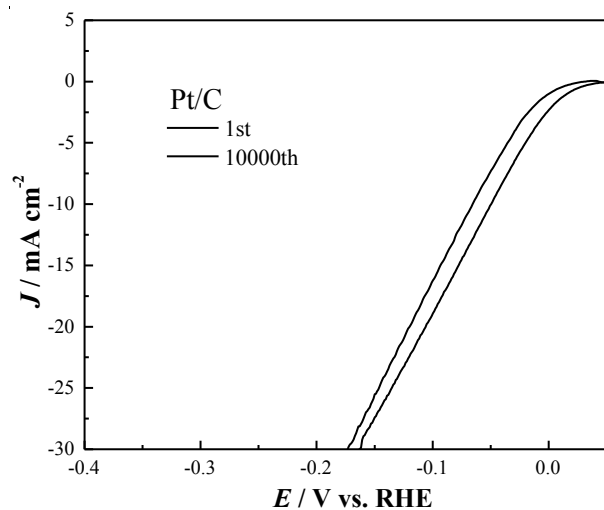

Fig. S7 HER stability after 10000 cycles for commercial Pt/C

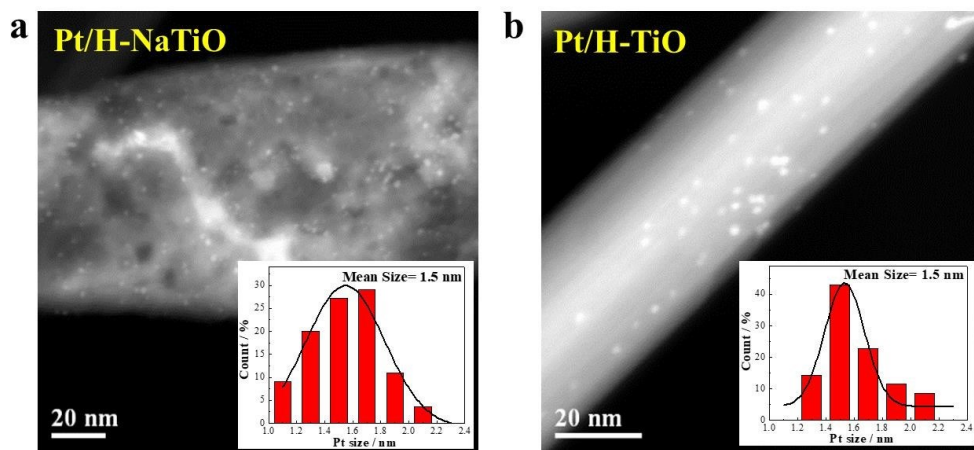

Fig. S8 TEM images for Pt/H-NaTiO and Pt/NaTiO catalysts after stability test.

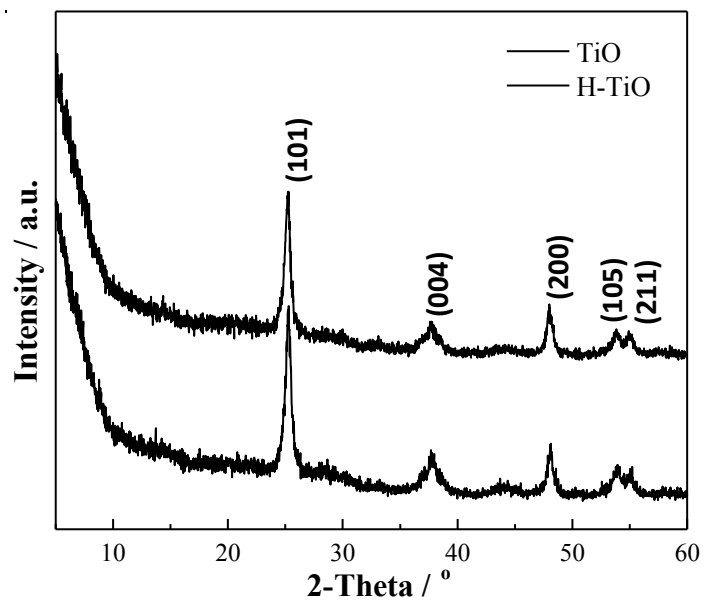

Fig. S9 XRD of Pt/TiO and Pt/H-TiO.

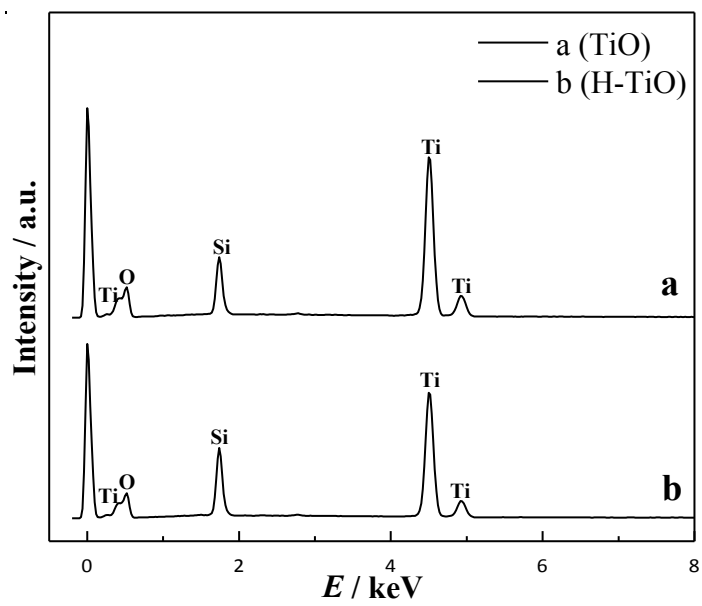

Fig. S10 EDS of Pt/TiO and Pt/H-TiO

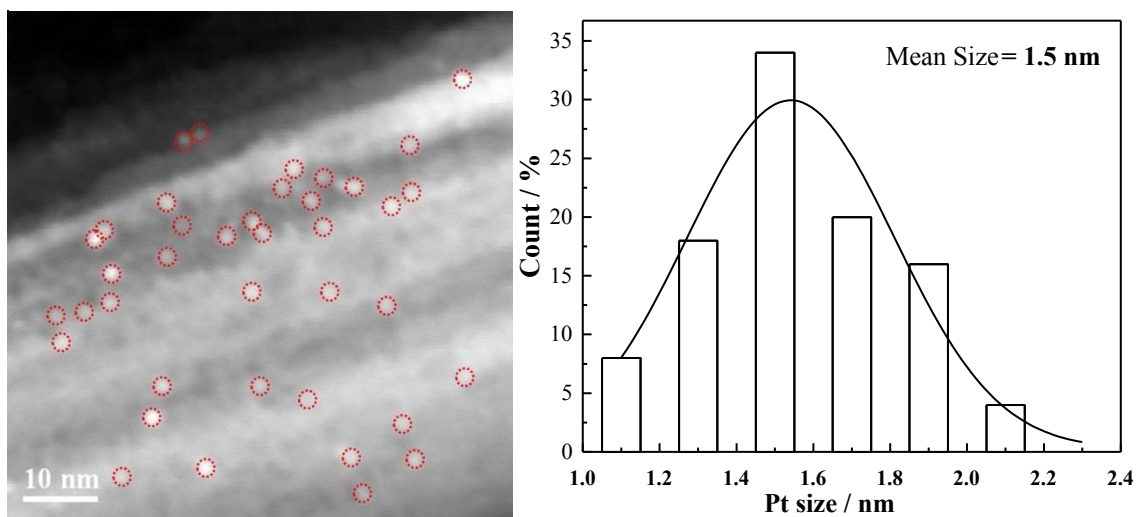

Fig. S11 HAADF-STEM image (a) of Pt/H-NaTiO and the related Pt size statistic.

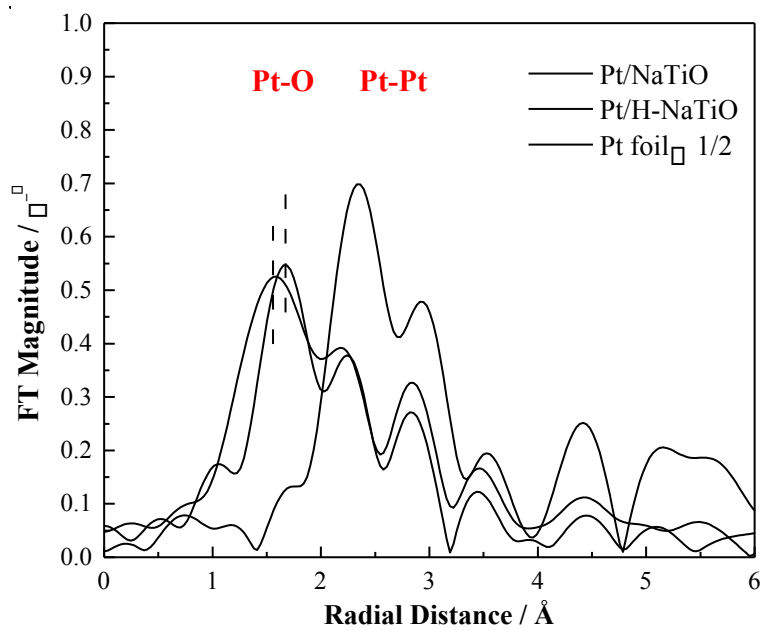

Fig. S12 Pt L<sub>3</sub>-edge EXAFS Fourier transformed (FT) spectra

Table S1 Comparison of HER performance with state-of-art Pt catalysts in literature

| Samples                                 | Electrolyte                           | Overpotential /<br>mV | Mass activity /<br>A·mg <sup>-1</sup> Pt | Supplementary<br>references |
|-----------------------------------------|---------------------------------------|-----------------------|------------------------------------------|-----------------------------|
| Pt NPs/NaTiO                            | 0.1 M HClO <sub>4</sub>               | 50                    | 10.3                                     | This work                   |
| ALD50Pt/NGNs                            | 0.5 M H <sub>2</sub> SO <sub>4</sub>  | 50                    | 10.1                                     | 1                           |
| Pt@DNA-GC                               | 0.5 M H <sub>2</sub> SO <sub>4</sub>  | 50                    | 1.33                                     | 2                           |
| Pt <sub>1</sub> /MC                     | 0.5 M H <sub>2</sub> SO <sub>4</sub>  | 65                    | 10                                       | 3                           |
| Pt <sub>3</sub> Ni <sub>2</sub> NWs-S/C | 0.05 M H <sub>2</sub> SO <sub>4</sub> | 70                    | ~5.8                                     | 4                           |
| PtSA-NT-NF                              | 1 M PBS                               | 50                    | 0.07                                     | 5                           |
| Pt-GDY2                                 | 0.5 M H <sub>2</sub> SO <sub>4</sub>  | 50                    | ~5                                       | 6                           |
| PtNi-O/C                                | 1 M KOH                               | 70                    | 7.23                                     | 7                           |
| Pt islands/Ni                           | 0.1 M KOH                             | 70                    | 7.7                                      | 8                           |
| CDs/Pt-PANI                             | 0.5 M H <sub>2</sub> SO <sub>4</sub>  | 50                    | ~3                                       | 9                           |



Table S2 Elemental contents for Pt/TiO, Pt/H-TiO, Pt/NaTiO and Pt/H-NaTiO

| Samples    | Na      | Ti    | O     | Si    |
|------------|---------|-------|-------|-------|
|            | Atomic% |       |       |       |
| Pt/TiO     | 0       | 23.87 | 69.02 | 7.11  |
| Pt/H-TiO   | 0       | 22.82 | 67.16 | 10.02 |
| Pt/NaTiO   | 6.74    | 24.38 | 67.84 | 1.04  |
| Pt/H-NaTiO | 2.46    | 18.79 | 62.42 | 16.34 |

## Supplementary References

1. N. C. Cheng, S. Stambula, D. Wang, M. N. Banis, J. Liu, A. Riese, B. W. Xiao, R. Y. Li, T. K. Sham, L. M. Liu, G. A. Botton and X. L. Sun, *Nature Communications*, 2016, **7**.
2. S. Anantharaj, P. E. Karthik, B. Subramanian and S. Kundu, *ACS Catal.*, 2016, **6**, 46604672.
3. H. Wei, K. Huang, D. Wang, R. Zhang, B. Ge, J. Ma, B. Wen, S. Zhang, Q. Li, M. Lei, C. Zhang, J. Irawan, L.-M. Liu and H. Wu, *Nature Communications*, 2017, **8**, 1490.
4. P. Wang, X. Zhang, J. Zhang, S. Wan, S. Guo, G. Lu, J. Yao and X. Huang, *Nature Communications*, 2017, **8**, 14580.
5. L. Zhang, L. Han, H. Liu, X. Liu and J. Luo, *Angewandte Chemie International Edition*, 2017, **56**, 13694-13698.
6. X.-P. Yin, H.-J. Wang, S.-F. Tang, X.-L. Lu, M. Shu, R. Si and T.-B. Lu, *Angewandte Chemie International Edition*, 2018, **57**, 9382-9386.
7. Z. Zhao, H. Liu, W. Gao, W. Xue, Z. Liu, J. Huang, X. Pan and Y. Huang, *Journal of the American Chemical Society*, 2018, **140**, 9046-9050.
8. A. Alinezhad, L. Gloag, T. M. Benedetti, S. Cheong, R. F. Webster, M. Roelsgaard, B. B. Iversen, W. Schuhmann, J. J. Gooding and R. D. Tilley, *Journal of the American Chemical Society*, 2019, **141**, 16202-16207.
9. Q. Dang, Y. Y. Sun, X. Wang, W. X. Zhu, Y. Chen, F. Liao, H. Huang and M. W. Shao, *Applied Catalysis B-Environmental*, 2019, **257**.
